# Supplementary material for: Ab- initio molecular dynamics study of the SN2 reaction Cl- + ClCH2CN
Source: Royal Society of Chemistry journal article supplement (doi:10.1039/b101560p), 2001-01-01
Supplement: tables.pdf [file tables.pdf]

## Supplementary Material to:

*Ab-initio* Molecular Dynamics study of the  $S_N2$  reaction  
 $Cl^- + ClCH_2CN$

By

Marco Pagliai, Simone Raugei, Gianni Cardini and Vincenzo Schettino

Laboratorio di Spettroscopia Molecolare, Dipartimento di Chimica,  
Università di Firenze, Via G. Capponi 9, 50121 Firenze, Italy, and  
European Laboratory for Nonlinear Spectroscopy (LENS), Largo E. Fermi  
2, 50125 Florence, Italy. E-mail: cardini@chim.unifi.it

| ClCH <sub>3</sub> +Cl <sup>-</sup> |        |        |        |        |        |        |        |        |        |
|------------------------------------|--------|--------|--------|--------|--------|--------|--------|--------|--------|
| Exp.                               | BLYP   |        |        | MP2    |        |        | B3LYP  |        |        |
|                                    | I      | M      | T      | I      | M      | T      | I      | M      | T      |
|                                    |        | 72.8   | 172.8  |        | 62.7   | 201.4  |        | 72.4   | 188.4  |
|                                    |        | 72.8   | 175.5  |        | 62.7   | 201.4  |        | 72.4   | 188.4  |
|                                    |        | 102.3  | 189.1  |        | 103.8  | 229.3  |        | 100.9  | 203.9  |
| 732.8                              | 666.1  | 471.9  | -274.1 | 785.5  | 708.5  | -557.9 | 709.4  | 573.6  | -345.5 |
| 1017.26                            | 997.1  | 922.6  | 841.4  | 1065.8 | 1029.6 | 980.8  | 1030.2 | 976.7  | 900.1  |
| 1017.26                            | 997.1  | 922.6  | 843.1  | 1065.8 | 1029.6 | 980.8  | 1030.2 | 976.7  | 900.1  |
| 1354.95                            | 1345.2 | 1246.1 | 965.6  | 1442.1 | 1385.1 | 1078.4 | 1388.4 | 1314.9 | 1030.1 |
| 1452.12                            | 1440.5 | 1416.7 | 1368.1 | 1493.7 | 1470.4 | 1415.5 | 1478.5 | 1457.7 | 1400.5 |
| 1452.12                            | 1440.5 | 1416.7 | 1368.1 | 1493.7 | 1470.4 | 1415.5 | 1478.5 | 1457.7 | 1400.5 |
| 2967.8                             | 2998.7 | 3050.9 | 3115.2 | 3116.1 | 3159.7 | 3228.9 | 3071.1 | 3119.6 | 3190.1 |
| 3039.25                            | 3092.7 | 3170.0 | 3305.8 | 3223.3 | 3279.6 | 3439.2 | 3168.9 | 3236.1 | 3388.7 |
| 3039.25                            | 3092.7 | 3170.0 | 3306.7 | 3223.3 | 3279.6 | 3439.2 | 3168.9 | 3236.1 | 3388.7 |

Table 1: Vibrational frequencies at the stationary points for the reaction  $Cl^- + ClCH_3$ . The calculations are performed with the 6-311+G(d,p) basis set. I, M and T label the isolated molecule, the ion-dipole complex and the transition state respectively. We have not included the frequency computed using PW since they were determined by a finite differences algorithm and are affected by a large uncertainty.

$ClCH_2CN+Cl^-$

| Exp. | BLYP   |        |        | MP2    |        |        | B3LYP  |        |        |
|------|--------|--------|--------|--------|--------|--------|--------|--------|--------|
|      | I      | M      | T      | I      | M      | T      | I      | M      | T      |
|      |        | 50.0   | 129.5  |        | 56.4   | 154.9  |        | 53.5   | 143.8  |
|      |        | 89.8   | 144.0  |        | 84.3   | 167.0  |        | 90.2   | 153.0  |
|      |        | 157.4  | 174.2  |        | 158.1  | 194.9  |        | 158.5  | 196.9  |
| 198  | 181.0  | 201.2  | 181.7  | 186.3  | 205.8  | 236.3  | 188.9  | 208.8  | 201.9  |
| 352  | 339.0  | 378.0  | 376.6  | 322.5  | 360.0  | 368.2  | 354.6  | 393.5  | 391.4  |
| 492  | 461.0  | 455.7  | 448.9  | 482.1  | 493.4  | 399.9  | 486.3  | 492.0  | 469.4  |
| 746  | 677.0  | 632.2  | -239.7 | 787.0  | 762.1  | -569.8 | 727.7  | 692.9  | -331.2 |
| 907  | 889.0  | 880.3  | 800.9  | 943.8  | 946.7  | 944.7  | 919.3  | 916.2  | 876.5  |
| 930  | 920.0  | 923.0  | 885.9  | 965.1  | 962.5  | 1001.0 | 953.4  | 952.1  | 953.9  |
| 1184 | 1164.0 | 1168.3 | 975.7  | 1240.1 | 1255.8 | 1002.6 | 1207.7 | 1217.7 | 1000.8 |
| 1270 | 1255.0 | 1279.6 | 999.5  | 1355.3 | 1404.7 | 1020.0 | 1303.1 | 1337.9 | 1024.3 |
| 1421 | 1422.0 | 1403.1 | 1383.6 | 1479.0 | 1478.0 | 1419.7 | 1461.6 | 1448.9 | 1417.4 |
| 2256 | 2257.0 | 2220.7 | 2223.2 | 2197.2 | 2188.0 | 2175.7 | 2361.5 | 2332.8 | 2335.4 |
| 2963 | 3012.0 | 2588.6 | 3180.4 | 3137.1 | 2837.8 | 3294.6 | 3090.3 | 2736.3 | 3262.1 |
| 3010 | 3063.0 | 3046.8 | 3299.7 | 3200.4 | 3169.3 | 3436.3 | 3143.6 | 3125.7 | 3389.5 |

Table 2: Vibrational frequencies at the stationary points for the reaction  $Cl^- + ClCH_2CN$ . The calculations are performed with the 6-311+G(d,p) basis set. I, M and T label the isolated molecule, the ion-dipole complex and the transition state respectively. We have not included the frequency computed using PW since they were determined by a finite differences algorithm and are affected by a large uncertainty.
